RESEARCH ARTICLE

# Factors affecting pouch-related outcomes after restorative proctocolectomy

Gyoung Tae Noh, Jeonghee Han, Min Soo Cho, Hyuk Hur, Byung Soh Min, Kang Young Lee, Nam Kyu Kim\*

Department of Surgery, Yonsei University College of Medicine, Seoul, South Korea

\* [namkyuk@yuhs.ac](mailto:namkyuk@yuhs.ac)

## Abstract

### Purposes

Restorative proctocolectomy (RPC) with ileal pouch anal anastomosis (IPAA) is the procedure of choice for patients with familial adenomatous polyposis (FAP) and ulcerative colitis (UC) despite morbidities that can lead to pouch failure. We aimed to identify factors associated with pouch-related morbidities.

### Methods

A retrospective analysis of patients who underwent RPC with IPAA was performed. To investigate the factors associated with pouch-related morbidities, patients' preoperative demographic and clinical factors, and intraoperative factors were included in the analysis.

### Results

A total of 49 patients with UC, FAP, and colorectal cancer were included. Twenty patients (40.8%) experienced leakage-related, functional, and/or pouchitis-related morbidities. Patients with American Society of Anesthesiologists (ASA) grade 2 or 3 had a higher risk of functional morbidity than those with grade 1. Intraoperative blood loss exceeding 300.0 mL was associated with an increased risk of pouchitis-related morbidity.

### Conclusions

Our study demonstrated associations of higher ASA grade and increased intraoperative blood loss with poor functional outcomes and pouchitis, respectively.

## Introduction

Restorative proctocolectomy (RPC) with ileal pouch anal anastomosis (IPAA) is the procedure of choice for patients with familial adenomatous polyposis (FAP) and ulcerative colitis (UC), and it is performed in selected cases of dysplasia or carcinoma of the colon or rectum [1, 2]. Since Parks and Nicholls first described an S-shaped IPAA as an ileal pouch with a hand-sewn

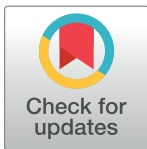

## OPEN ACCESS

**Citation:** Noh GT, Han J, Cho MS, Hur H, Min BS, Lee KY, et al. (2017) Factors affecting pouch-related outcomes after restorative proctocolectomy. PLoS ONE 12(10): e0186596. <https://doi.org/10.1371/journal.pone.0186596>

**Editor:** Emiko Mizoguchi, Kurume University School of Medicine, JAPAN

**Received:** August 16, 2016

**Accepted:** October 4, 2017

**Published:** October 19, 2017

**Copyright:** © 2017 Noh et al. This is an open access article distributed under the terms of the [Creative Commons Attribution License](https://creativecommons.org/licenses/by/4.0/), which permits unrestricted use, distribution, and reproduction in any medium, provided the original author and source are credited.

**Data Availability Statement:** All relevant data are within the paper and its Supporting Information files.

**Funding:** The authors received no specific funding for this work.

**Competing interests:** The authors have declared that no competing interests exist.

anastomosis to the dentate line after mucosectomy of the remnant rectum, this procedure has evolved with the introduction of the J pouch and stapled anastomosis in the 1980s [3, 4]. The shift in the surgical paradigm to minimally invasive surgery led to the introduction of a laparoscopic approach to RPC, which had initially been performed via an open approach and accompanied diverting ileostomy. This shift resulted in fewer long-term complications and even the avoidance of diverting ileostomy in select cases [5–7].

RPC with IPAA completely removes the diseased colonic and rectal mucosa while maintaining normal sphincter function and avoiding the morbidity associated with permanent ileostomy; accordingly, most patients obtain satisfactory results [8–10]. However, IPAA remains a technically demanding procedure with relatively high perioperative morbidity rates ranging from 30% to 60%, and some patients experience pouch failure and eventual pouch excision [11–15]. Pouch failure after IPAA has been reported to occur in 5–10% of patients due to anastomotic complications, pouch dysfunction, recalcitrant pouchitis, and other emergency presentations such as bowel ischemia and obstruction [14, 16–18].

Preoperative identification of patients at risk for pouch-related morbidities would facilitate the establishment of surgical strategies and allow better counseling and consideration of alternative surgical treatment options for diseases otherwise amenable to IPAA. Furthermore, increased recognition of the intraoperative factors associated with pouch-related morbidities could enable the avoidance of these factors. In this context, we reviewed the characteristics of our patients and investigated pouch-related morbidities after RPC with IPAA to identify morbidity-associated factors. We further compared the outcomes between surgical methods to determine the optimal surgical options.

## Materials and methods

The medical records of consecutive patients who underwent RPC with IPAA for the treatment of FAP, UC, and colorectal cancer between January 2006 and December 2014 were reviewed retrospectively. The study was reviewed and approved by the Severance Hospital Institutional Review Board. A waiver of informed consent was approved by the Severance Hospital Institutional Review Board given the retrospective nature of the study. The operations were performed by 5 surgeons, and all patients in the stated period underwent total proctocolectomy and IPAA simultaneously in an elective setting. Surgery was performed through either an open or a laparoscopic approach, and the choice of hand-sewn or stapled anastomosis was determined according to the degree of rectal inflammation in patients with UC and the severity of rectal polyposis in those with FAP. An ileal pouch was created using a linear stapler intracorporeally or extracorporeally, according to surgeon preference. The configuration of the ileal pouch was J-shaped with a length of 20 cm, which was identical in both the laparoscopic and open approach. For hand-sewn IPAA, mucosectomy of the lower rectum was performed routinely through a perineal approach. For stapled IPAA, double-stapled anastomosis without mucosectomy was performed with the staple line in the very low rectum, and the rectal cuff was shortened as much as technically possible. Protective loop ileostomy was optional. Decisions regarding ileostomy formation were made intraoperatively and based on the technical difficulty of anastomosis, mesenteric tension, intraoperative primary impermeability of the anastomosis at control, and the patient's preference.

Preoperative patient data included age, sex, underlying disease, American Society of Anesthesiologists (ASA) grade, body mass index (BMI), smoking history, and the presence of malignancy. Operative data included surgical approach (open or laparoscopic), method of anastomosis (hand-sewn or stapled), formation of diverting ileostomy, duration of the operation, blood loss during the operation, and intraoperative transfusion. Postoperative data

included 3 types of pouch-related morbidities: pouch-leakage-related, pouchitis-related, and pouch function-related complications.

Demographic and clinical variables were defined as follows. The presence of malignancy was defined as the coexistence of pathologically diagnosed colonic or rectal adenocarcinoma. Pouch leakage was defined as a defect in the anastomosis or pouch stump, and pouch-associated fistula was defined as an abnormal passage or sinus from the pouch to another surface or organ. Pouchitis was defined as clinical presentation with typical symptoms of pouchitis (increased number and looser consistency of bowel movements, rectal bleeding, urgency, incontinence, and/or abdominal or pelvic cramping) and at least 1 abnormal pouch endoscopy during a symptomatic episode. Pouchitis-related stricture was defined as the appearance of narrowing at the anastomosis that required surgical dilation during the follow-up period for pouchitis. Intractable diarrhea was defined as antidiarrheal agent-unresponsive stool frequency more than 10 times a day for more than 1 year without evidence of infection. Fecal incontinence was defined as a prolonged involuntary loss of liquid or solid stool that required pad use for more than 1 year after surgery. Pouch failure was defined as the need for permanent stoma construction with excision of the ileoanal pouch or abdominoperineal reconstruction for complications.

Data were analyzed using SPSS Statistics (version 20.0; IBM Corp., Armonk, NY, USA). Descriptive results are presented as medians and interquartile ranges (Q1–Q3) for continuous outcomes, and as frequencies and percentages for categorical outcomes. A binary logistic regression model was used to identify risk factors for pouch-related morbidities. Variables with a *P*-value < 0.10 in the univariate analysis were selected for multivariate analysis. Continuous variables were dichotomized according to clinical implications or by using the median value of each variable as the cut-off value. To compare the outcomes between surgical methods, continuous variables were analyzed using a Mann-Whitney U test, and categorical variables were analyzed using a chi-square test. A *P*-value < 0.05 was considered statistically significant.

## Results

### Patient characteristics

A total of 49 patients were included in the analysis, and the median follow-up period was 41.0 months (24.0–82.5 months). The characteristics of all enrolled patients are summarized in [Table 1](#). The median patient age was 40.0 years, and the sex distribution was almost even (25 male and 24 female patients). The mean BMI was 22.0 kg/m<sup>2</sup> (19.0–24.0 kg/m<sup>2</sup>), and 9 patients (18.4%) had a history of smoking.

Thirty-one patients (63.3%) had been diagnosed with UC, and 16 (32.7%) had been diagnosed with FAP. In addition, 2 patients had been diagnosed with colorectal cancer without underlying UC or FAP; one patient had triple synchronous cancers that arose from the ascending colon, rectosigmoid junction, and distal rectum, and the other was diagnosed with a solitary rectal cancer that caused complete rectal obstruction. Twenty-five (51.0%), 18 (36.7%), and 6 patients (12.2%) were classified with ASA grade 1, 2, and 3, respectively. Combined malignancies that originated from the colorectal mucosa were identified pathologically in 12 patients (24.5%).

Thirty-four (69.4%) and 15 patients (30.6%) underwent surgery via a laparoscopic approach and open approach, respectively. In 34 patients (69.4%), hand-sewn ileoanal anastomoses were performed, while stapled anastomoses were performed in 15 patients (30.6%). For the laparoscopic approach, 22 patients (64.7%) and 12 patients (35.3%) underwent hand-sewn and stapled anastomoses, respectively. For the open approach, 12 patients (80.0%) and 3 patients

**Table 1. Preoperative and operative characteristics.**

| <b>Demographics</b>                   |                     |
|---------------------------------------|---------------------|
| Age (years)                           | 40.0 (31.0–51.0)    |
| Sex                                   |                     |
| Male                                  | 25 (51.0%)          |
| Female                                | 24 (49.0%)          |
| Underlying disease                    |                     |
| Ulcerative colitis                    | 31 (63.3%)          |
| Familial adenomatous polyposis        | 16 (32.7%)          |
| Colorectal cancer                     | 2 (4.1%)            |
| <sup>†</sup> ASA classification       |                     |
| Grade 1                               | 25 (51.0%)          |
| Grade 2                               | 18 (36.7%)          |
| Grade 3                               | 6 (12.2%)           |
| <sup>‡</sup> BMI (kg/m <sup>2</sup> ) | 22.0 (19.0–24.0)    |
| Smoking history                       |                     |
| Present                               | 9 (18.4%)           |
| Absent                                | 40 (81.6%)          |
| Presence of malignancy                |                     |
| Present                               | 12 (24.5%)          |
| Absent                                | 37 (75.5%)          |
| Surgical modality                     |                     |
| Open approach                         | 15 (30.6%)          |
| Laparoscopic approach                 | 34 (69.4%)          |
| Anastomosis method                    |                     |
| Hand-sewn                             | 34 (69.4%)          |
| Double-stapled                        | 15 (30.6%)          |
| Diverting ileostomy                   |                     |
| Present                               | 40 (81.6%)          |
| Absent                                | 9 (18.4%)           |
| Duration of operation (minutes)       | 332.0 (280.0–438.0) |
| Blood loss during operation (mL)      | 150.0 (25.0–475.0)  |
| Intraoperative transfusion            |                     |
| Present                               | 9 (18.4%)           |
| Absent                                | 40 (81.6%)          |

Data are presented as medians (interquartile range, Q1-Q3), or n (%).

<sup>†</sup>ASA: American Society of Anesthesiologists.

<sup>‡</sup>BMI: body mass index.

<https://doi.org/10.1371/journal.pone.0186596.t001>

(20.0%) underwent hand-sewn and stapled anastomoses, respectively. There was no significant relationship between surgical approach and anastomosis method ( $P = 0.336$ ). Diverting ileostomy was performed in 40 patients (81.6%). The median duration of the operation was 332.0 minutes (280.0–438.0 minutes). The median blood loss volume was 150.0 mL (25.0–475.0 mL), and 9 patients (18.4%) received intraoperative transfusion.

### Pouch-related morbidity

Twenty patients (40.8%) experienced pouch-related morbidities (Table 2). Pouch leakage-related morbidity occurred in 8 patients (16.8%), including 6 patients (16.3%) with pouch

**Table 2. Pouch-related morbidity profiles.**

| Variables                            | Number (%) |
|--------------------------------------|------------|
| Overall morbidity                    | 20 (40.8)  |
| Leakage related                      | 8 (16.3)   |
| Pouch leakage                        | 6 (12.2)   |
| Pouch associated fistula             | 2 (4.1)    |
| †Pouchitis related                   | 8 (16.3)   |
| Pouchitis                            | 8 (16.3)   |
| Pouchitis related stricture          | 2 (4.1)    |
| †Function related                    | 8 (16.3)   |
| Intractable diarrhea (>10 times/day) | 8 (16.3)   |
| Fecal incontinence                   | 3 (6.1)    |

†Data include duplicate patients.

<https://doi.org/10.1371/journal.pone.0186596.t002>

leakage and 2 patients (4.1%) with a fistula between the pouch and the vagina. Pouchitis was observed in 8 patients (16.3%), and 2 (4.1%) experienced anastomotic stricture. Eight patients (16.3%) experienced intractable diarrhea for more than 1 year after surgery, and 3 (6.1%) presented with fecal incontinence. Two patients (4.1%) with pouch failure required pouch excision because of pouch leakage and pouch-vaginal fistula, respectively. Comparing the incidence of pouch-related morbidities according to the surgeon groups categorized by surgical experience, 38 patients (77.6%) operated by two surgeons with experience of more than 10 cases showed 36.8% and 11 patients (22.4%) operated by the other three surgeons with experience of less than 10 cases showed 54.5%, which was not statistically significant ( $P = 0.320$ ).

### Factors associated with pouch-related morbidities

The results of the analysis for the associations between the pre-/intraoperative factors and these morbidities are described in Table 3. Patients with ASA grade 2 and 3 had a higher risk of function-related morbidity relative to those with grade 1 (odds ratio [OR] = 9.9; 95% confidence interval [CI]: 1.1–87.9;  $P = 0.04$ ). Intraoperative blood loss exceeding 300.0 mL was associated with an increased risk of pouchitis (OR = 7.3; 95% CI: 1.3–43.1;  $P = 0.025$ ). Furthermore, patients who received an intraoperative blood transfusion had an increased risk of pouchitis-related morbidities (OR = 7.2; 95% CI: 1.4–38.3;  $P = 0.021$ ). No statistically significant associations were observed with other preoperative factors, including underlying disease entity (UC or FAP), BMI > 25 kg/m<sup>2</sup>, smoking history, and presence of malignancy, or with surgical factors, such as the surgical approach (open or laparoscopic), method of anastomosis (hand-sewn or stapled), or formation of a diverting ileostomy. In the multivariate analysis, patients who experienced intraoperative blood loss exceeding 300.0 mL exhibited a significantly increased risk of pouchitis-related morbidities (OR = 6.3; 95% CI: 1.0–38.9;  $P = 0.047$ ). Although not statistically significant, an association between intraoperative blood transfusion and a trend towards an increased risk of pouchitis (OR = 6.1; 95% CI: 1.0–36.8;  $P = 0.05$ ) was seen.

### Subgroup analysis according to surgical method

Table 4 presents a comparison of outcomes, including the duration of the operation, intraoperative blood loss volume, duration of postoperative hospital stay, and the occurrence of pouch-related morbidity, according to the surgical methods. In comparison with open surgery, laparoscopic surgery showed a longer operative duration, reduced blood loss, and a shortened

**Table 3. Factors associated with pouch-related morbidities.**

| Variables                               | Leakage related morbidity |       | Pouchitis related morbidity |       | Function related morbidity |       |
|-----------------------------------------|---------------------------|-------|-----------------------------|-------|----------------------------|-------|
|                                         | OR (95% CI)               | P     | OR (95% CI)                 | P     | OR (95% CI)                | P     |
| Age (over 40 years)                     | 1.930 (0.407–9.160)       | 0.408 | 1.930 (0.107–9.160)         | 0.408 | 3.833 (0.690–21.302)       | 0.125 |
| Sex (female)                            | 1.930 (0.407–9.160)       | 0.408 | 0.571 (0.120–2.711)         | 0.481 | 0.571 (0.120–2.711)        | 0.481 |
| Underlying disease                      |                           |       |                             |       |                            |       |
| Familial adenomatous polyposis          | 1                         | 0.256 | 1                           | 0.187 | 1                          | 0.556 |
| Ulcerative colitis                      | 3.6 (0.394–32.871)        |       | 4.375 (0.488–39.184)        |       | 1.680 (0.298–9.466)        |       |
| †ASA grade (grade 2, 3)                 | 1.050 (0.231–4.778)       | 0.95  | 1.930 (0.407–9.160)         | 0.408 | 9.882 (1.111–87.902)       | 0.04  |
| ‡BMI (over 25 kg/m <sup>2</sup> )       | 1.944 (0.315–11.996)      | 0.474 | N/A                         |       | 1.733 (0.073–6.568)        | 0.750 |
| Smoking history                         | N/A                       |       | 1.619 (0.269–9.748)         | 0.599 | 0.589 (0.063–5.497)        | 0.643 |
| Presence of malignancy                  | 1.033 (0.179–5.958)       | 0.971 | N/A                         |       | N/A                        |       |
| Surgical modality                       |                           |       |                             |       |                            |       |
| Open approach                           | 1                         | 0.707 | 1                           | 0.204 | 1                          | 0.204 |
| Laparoscopic approach                   | 1.393 (0.247–7.858)       |       | 0.367 (0.078–1.725)         |       | 0.367 (0.078–1.725)        |       |
| Anastomosis method                      |                           |       |                             |       |                            |       |
| Hand-sewn                               | 1                         | 0.707 | 1                           | 0.654 | 1                          | 0.247 |
| Double-stapled                          | 0.718 (0.127–4.051)       |       | 1.450 (0.298–7.051)         |       | 0.276 (0.031–2.468)        |       |
| Diverting ileostomy                     | 0.618 (0.103–3.719)       | 0.599 | N/A                         |       | 1.697 (0.182–15.831)       | 0.643 |
| Duration of operation (> 332.0 minute)  | 3.474 (0.626–19.283)      | 0.154 | 0.952 (0.209–4.334)         | 0.95  | 0.261 (0.047–1.450)        | 0.125 |
| Blood loss during operation (>300.0 mL) | 3.590 (0.743–17.346)      | 0.112 | 7.250 (1.278–41.139)        | 0.025 | 0.521 (0.093–2.905)        | 0.457 |
| Intraoperative transfusion              | 1.619 (0.269–9.748)       | 0.599 | 7.200 (1.353–38.326)        | 0.021 | 3.5 (0.657–18.648)         | 0.142 |

†ASA: American Society of Anesthesiologists.

‡BMI: body mass index.

<https://doi.org/10.1371/journal.pone.0186596.t003>

postoperative hospital stay, which were not statistically significant. Both methods were associated with similar rates of pouch-related morbidity. Similar results were achieved with comparisons of hand-sewn vs. double-stapled anastomosis, and the performance or omission of diverting ileostomy.

## Discussion

In this study, 40.8% of patients developed pouch-related morbidities after RPC with IPAA. In addition, 4.1% of patients experienced pouch failure that required pouch excision. These high

**Table 4. Factors associated with pouch-related morbidities.**

| Variables                          | Surgical modality |               |       | Anastomosis method |                |       | Diverting ileostomy |               |       |
|------------------------------------|-------------------|---------------|-------|--------------------|----------------|-------|---------------------|---------------|-------|
|                                    | Open              | Laparoscopy   | P     | Hand-sewn          | Double-stapled | P     | Present             | Absent        | P     |
| Duration of operation (minutes)    | 299.0             | 353.5         | 0.140 | 322.0              | 353.0          | 0.428 | 324.0               | 353.0         | 0.423 |
|                                    | (243.0–459.0)     | (306.0–437.5) |       | (270.0–437.5)      | (321.0–459.0)  |       | (273.3–436.0)       | (318.0–471.0) |       |
| Blood loss during operation (mL)   | 220.0             | 150.0         | 0.463 | 210.0              | 100.0          | 0.120 | 200.0               | 100.0         | 0.162 |
|                                    | (0.0–550.0)       | (37.5–412.5)  |       | (50.0–500.0)       | (0.0–100.0)    |       | (50.0–200.0)        | (0.0–100.0)   |       |
| Postoperative hospital stay (days) | 12.0              | 11.5          | 0.306 | 11.0               | 12.0           | 0.281 | 11.5                | 12.0          | 0.326 |
|                                    | (11.0–14.0)       | (8.0–15.25)   |       | (9.0–13.3)         | (11.0–17.0)    |       | (9.0–13.8)          | (10.5–17.5)   |       |
| Pouch related morbidity            |                   |               |       |                    |                |       |                     |               |       |
| Present                            | 4 (26.7%)         | 9 (26.5%)     | 1.000 | 9 (26.5%)          | 4 (26.7%)      | 1.000 | 11 (27.5%)          | 2 (22.2%)     | 1.000 |
| Absent                             | 11 (73.3%)        | 25 (73.5%)    |       | 25 (73.5%)         | 11 (73.3%)     |       | 29 (72.5%)          | 7 (77.8%)     |       |

<https://doi.org/10.1371/journal.pone.0186596.t004>



complication rates underscore the technical complexity of RPC with IPAA and indicate the substantial problems encountered by surgeons. According to previous studies, perioperative morbidity after RPC with IPAA ranges from 30% to 60% [11–15], with reported pouch failure rates of 3.5–15% [14, 16, 19–22]. In previous reports, pouch-related morbidities have been described as pouch-pelvic sepsis, including pouch-sacral, -perineal, or -vaginal fistulas or anastomotic defects, pouchitis, and pouch dysfunction [18, 23–26]. We categorized our patients using similar criteria for leakage-related, pouchitis-related, and function-related morbidities and analyzed the data to identify the factors associated with pouch-related morbidity.

In our analysis, higher ASA grade and increased blood loss during the operation were found to be significantly relevant to function-related and pouchitis-related morbidities, respectively. Patients with ASA grades 2 or 3 were more likely to develop function-related morbidities, such as intractable diarrhea or fecal incontinence, compared to those with ASA grade 1. This result is generally acceptable because patients in poor general condition would be expected to have poor remnant bowel or anal function. Patients who experienced blood loss during the operation in excess of 300.0 mL were found to have an increased risk of pouchitis compared to those with less blood loss, and a trend towards an increased risk for pouchitis was observed in patients who received an intraoperative blood transfusion, although this increase was not statistically significant. In a previous study of predictive factors for pouchitis, the authors reported that intraoperative transfusion was associated with the development of pouchitis, and described the role of hypoxemia in the development of pouchitis [27]. Although the importance of systemic hypoxemia in the pathogenesis of pouchitis has not been described and requires further investigation, hypovolemia and inadequate perfusion caused by intraoperative blood loss might induce hypoxemia in the pouch.

Previous reports have suggested that underlying disease entity and severity, as well as obesity, affect pouch-related morbidities [16, 28, 29]. Fazio et al. [16] reported that UC increased the risk of stricture and pouchitis in a study of surgical outcomes and quality of life after IPAA in 3,707 patients. In another previous report, multivariate analysis revealed that patients with pancolitis were at risk of developing chronic pouchitis [28]. In a recent study, the authors suggested that obesity, defined as a BMI > 30, was an independent risk factor for pouch-related complications, citing technical complexity and challenges associated with IPAA creation in obese patients as reasons [29]. Taken together, these risk factors indicate that particularly careful follow-up is required for patients after RPC with IPAA because of the high likelihood of pouch-related morbidities leading to pouch failure and a need for reoperation.

Regarding surgical methods for RPC with IPAA, several studies have reported poor outcomes with hand-sewn anastomosis. For example, Manilich et al. [30] suggested that hand-sewn anastomosis was associated with a higher ileal pouch failure rate, compared with stapled anastomosis. Additionally, an association between hand-sewn anastomosis and pouch failure was reported by MacRae et al [31]. In contrast, a meta-analysis of 4,183 patients failed to show a significant effect of hand-sewn anastomosis on pouch survival [32]. In our study, the anastomosis method was not significantly associated with pouch-related morbidities. Furthermore, no significant differences in other surgical outcomes were observed between hand-sewn and stapled anastomosis.

In the present study, the comparison of open and laparoscopic approaches also failed to reveal significant differences in surgical outcomes. The choice of an open vs. laparoscopic approach is no longer a controversial issue. Laparoscopic approach has replaced the open approach with the development of technology and accumulation of experience with minimally invasive surgery. In the context of RPC with IPAA, laparoscopic surgery is considered both safe and feasible, which has been advocated by multiple studies [33]. In the present study, the

proportion of laparoscopic approach to RPC with IPAA was 69.4, and this is expected to increase in the future.

Along with the expansion of the laparoscopic approach for RPC with IPAA, attempts have been made to skip fecal diversion. Traditionally, diverting ileostomy was routinely performed after IPAA. However, the role of the diverting ileostomy is currently controversial. Recently, Kiran et al. reported that a proximal diverting ileostomy did not protect against pelvic sepsis [34], and other studies have supported the finding that proximal diversion does not prevent anastomotic leakage [35, 36]. In accordance with those results, the present study found no significant association between the formation of a diverting ileostomy and pouch-related morbidity.

We must acknowledge the limitations of the present study. First, this was a retrospective study and not a prospective trial. Therefore, uncontrollable and unknown biases, including recall bias, information bias, and selection bias, may have been present. Untested variables that may have influenced the outcome could include the number of surgeons and physicians. Second, few centers that perform IPAA will experience a large number of pouch-related morbidities. As such, this study involved a single-center retrospective series and was inherently limited by a small sample size and relatively short follow-up period. Given these limitations, the results of this study cannot be considered confirmative evidence, and must be considered the basis for future studies. However, this study has provided a comprehensive analysis of potential risk factors for pouch-related morbidities and the impact of surgical methods on surgical outcomes. Certainly, further studies will be required to advance our knowledge of the surgical consequences of RPC with IPAA in order to better manage such patients.

In conclusion, the present study found associations between a higher ASA grade and a poor functional outcome, and between increased intraoperative blood loss and the occurrence of pouchitis. However, surgical method-related factors, such as the surgical approach (laparoscopic or open), anastomosis method (hand-sewn or stapled), and the omission of a diverting ileostomy, did not affect surgical outcomes.

## Supporting information

**S1 Dataset. Data for enrolled patients underwent restorative proctocolectomy with ileal pouch anal anastomosis.**  
(XLSX)

## Author Contributions

**Conceptualization:** Gyoung Tae Noh, Nam Kyu Kim.

**Data curation:** Gyoung Tae Noh, Jeonghee Han, Min Soo Cho, Hyuk Hur, Byung Soh Min, Nam Kyu Kim.

**Formal analysis:** Gyoung Tae Noh, Jeonghee Han, Min Soo Cho, Hyuk Hur, Byung Soh Min.

**Investigation:** Gyoung Tae Noh, Jeonghee Han, Min Soo Cho, Hyuk Hur, Byung Soh Min, Kang Young Lee, Nam Kyu Kim.

**Methodology:** Gyoung Tae Noh, Jeonghee Han, Min Soo Cho, Hyuk Hur, Byung Soh Min, Kang Young Lee, Nam Kyu Kim.

**Project administration:** Gyoung Tae Noh, Jeonghee Han, Byung Soh Min.

**Resources:** Gyoung Tae Noh, Jeonghee Han, Hyuk Hur, Kang Young Lee, Nam Kyu Kim.



**Software:** Gyoung Tae Noh, Jeonghee Han, Hyuk Hur.

**Supervision:** Min Soo Cho, Hyuk Hur, Byung Soh Min, Kang Young Lee, Nam Kyu Kim.

**Validation:** Jeonghee Han, Min Soo Cho, Hyuk Hur, Byung Soh Min, Kang Young Lee, Nam Kyu Kim.

**Visualization:** Jeonghee Han, Min Soo Cho, Hyuk Hur, Kang Young Lee, Nam Kyu Kim.

**Writing – original draft:** Gyoung Tae Noh, Nam Kyu Kim.

**Writing – review & editing:** Gyoung Tae Noh, Nam Kyu Kim.

## References

1. Williams NS. Restorative proctocolectomy is the first choice elective surgical treatment for ulcerative colitis. *The British journal of surgery*. 1989; 76(11):1109–10. Epub 1989/11/01. PMID: [2688800](#).
2. Ambroze WL Jr., Dozois RR, Pemberton JH, Beart RW Jr., Ilstrup DM. Familial adenomatous polyposis: results following ileal pouch-anal anastomosis and ileorectostomy. *Diseases of the colon and rectum*. 1992; 35(1):12–5. Epub 1992/01/11. PMID: [1310269](#).
3. Utsunomiya J, Iwama T, Imajo M, Matsuo S, Sawai S, Yaegashi K, et al. Total colectomy, mucosal proctectomy, and ileoanal anastomosis. *Diseases of the colon and rectum*. 1980; 23(7):459–66. Epub 1980/10/01. PMID: [6777128](#).
4. Keighley MR, Yoshioka K, Kmiot W. Prospective randomized trial to compare the stapled double lumen pouch and the sutured quadruple pouch for restorative proctocolectomy. *The British journal of surgery*. 1988; 75(10):1008–11. Epub 1988/10/01. PMID: [3219525](#).
5. Gullberg K, Liljeqvist L. Stapled ileoanal pouches without loop ileostomy: a prospective study in 86 patients. *International journal of colorectal disease*. 2001; 16(4):221–7. Epub 2001/08/23. PMID: [11515681](#).
6. Joyce MR, Kiran RP, Remzi FH, Church J, Fazio VW. In a select group of patients meeting strict clinical criteria and undergoing ileal pouch-anal anastomosis, the omission of a diverting ileostomy offers cost savings to the hospital. *Diseases of the colon and rectum*. 2010; 53(6):905–10. Epub 2010/05/21. <https://doi.org/10.1007/DCR.0b013e3181d5e0fd> PMID: [20485004](#).
7. Remzi FH, Fazio VW, Gorgun E, Ooi BS, Hammel J, Preen M, et al. The outcome after restorative proctocolectomy with or without defunctioning ileostomy. *Diseases of the colon and rectum*. 2006; 49(4):470–7. Epub 2006/03/07. <https://doi.org/10.1007/s10350-006-0509-2> PMID: [16518581](#).
8. Watts JM, de Dombal FT, Goligher JC. Long-term complications and prognosis following major surgery for ulcerative colitis. *The British journal of surgery*. 1966; 53(12):1014–23. Epub 1966/12/01. PMID: [5927652](#).
9. Lovegrove RE, Heriot AG, Constantinides V, Tilney HS, Darzi AW, Fazio VW, et al. Meta-analysis of short-term and long-term outcomes of J, W and S ileal reservoirs for restorative proctocolectomy. *Colorectal disease: the official journal of the Association of Coloproctology of Great Britain and Ireland*. 2007; 9(4):310–20. Epub 2007/04/17. <https://doi.org/10.1111/j.1463-1318.2006.01093.x> PMID: [17432982](#).
10. Michelassi F, Lee J, Rubin M, Fichera A, Kasza K, Karrison T, et al. Long-term functional results after ileal pouch anal restorative proctocolectomy for ulcerative colitis: a prospective observational study. *Annals of surgery*. 2003; 238(3):433–41; discussion 42–5. Epub 2003/09/23. <https://doi.org/10.1097/01.sla.0000086658.60555.ea> PMID: [14501509](#)
11. Alexander F. Complications of ileal pouch anal anastomosis. *Seminars in pediatric surgery*. 2007; 16(3):200–4. Epub 2007/07/03. <https://doi.org/10.1053/j.sempedsurg.2007.04.009> PMID: [17602976](#).
12. Efron JE, Uriburu JP, Wexner SD, Pikarsky A, Hamel C, Weiss EG, et al. Restorative proctocolectomy with ileal pouch anal anastomosis in obese patients. *Obesity surgery*. 2001; 11(3):246–51. Epub 2001/07/04. <https://doi.org/10.1381/096089201321336520> PMID: [11433894](#).
13. Kiran RP, Remzi FH, Fazio VW, Lavery IC, Church JM, Strong SA, et al. Complications and functional results after ileoanal pouch formation in obese patients. *Journal of gastrointestinal surgery: official journal of the Society for Surgery of the Alimentary Tract*. 2008; 12(4):668–74. Epub 2008/01/30. <https://doi.org/10.1007/s11605-008-0465-3> PMID: [18228111](#).
14. Shin US, Yu CS, Kim DD, Yoon SN, Kim JC. Risk Factors of Pouch Failure after a Restorative Proctocolectomy. *Journal of the Korean Society of Coloproctology*. 2008; 24(4):252–9.
15. Kim NK, Lee KY, Park JS, Park JK, Sohn SK, Min JS. Restorative proctocolectomy: operative safety and functional outcomes. *Journal of the Korean Surgical Society*. 2001; 60(4):438–42.

16. Fazio VW, Kiran RP, Remzi FH, Coffey JC, Heneghan HM, Kirat HT, et al. Ileal pouch anal anastomosis: analysis of outcome and quality of life in 3707 patients. *Annals of surgery*. 2013; 257(4):679–85. Epub 2013/01/10. <https://doi.org/10.1097/SLA.0b013e31827d99a2> PMID: 23299522.
17. Shawki S, Belizon A, Person B, Weiss EG, Sands DR, Wexner SD. What are the outcomes of reoperative restorative proctocolectomy and ileal pouch-anal anastomosis surgery? *Diseases of the colon and rectum*. 2009; 52(5):884–90. Epub 2009/06/09. <https://doi.org/10.1007/DCR.0b013e31819eef8f> PMID: 19502852.
18. Maya AM, Boutros M, DaSilva G, Wexner SD. IPAA-related sepsis significantly increases morbidity of ileoanal pouch excision. *Diseases of the colon and rectum*. 2015; 58(5):488–93. Epub 2015/04/09. <https://doi.org/10.1097/DCR.0000000000000330> PMID: 25850835.
19. Prudhomme M, Dehni N, Dozois RR, Tiret E, Parc R. Causes and outcomes of pouch excision after restorative proctocolectomy. *The British journal of surgery*. 2006; 93(1):82–6. Epub 2005/11/17. <https://doi.org/10.1002/bjs.5147> PMID: 16288450.
20. Lepisto A, Luukkonen P, Jarvinen HJ. Cumulative failure rate of ileal pouch-anal anastomosis and quality of life after failure. *Diseases of the colon and rectum*. 2002; 45(10):1289–94. Epub 2002/10/24. <https://doi.org/10.1097/01.DCR.0000027032.95753.11> PMID: 12394424.
21. Parc Y, Piquard A, Dozois RR, Parc R, Tiret E. Long-term outcome of familial adenomatous polyposis patients after restorative colectomy. *Annals of surgery*. 2004; 239(3):378–82. Epub 2004/04/13. <https://doi.org/10.1097/01.sla.0000114216.90947.f6> PMID: 15075655
22. Shen B, Yu C, Lian L, Remzi FH, Kiran RP, Fazio VW, et al. Prediction of late-onset pouch failure in patients with restorative proctocolectomy with a nomogram. *Journal of Crohn's & colitis*. 2012; 6(2):198–206. Epub 2012/02/14. <https://doi.org/10.1016/j.crohns.2011.08.006> PMID: 22325174.
23. Penna C, Dozois R, Tremaine W, Sandborn W, LaRusso N, Schleck C, et al. Pouchitis after ileal pouch-anal anastomosis for ulcerative colitis occurs with increased frequency in patients with associated primary sclerosing cholangitis. *Gut*. 1996; 38(2):234–9. Epub 1996/02/01. PMID: 8801203
24. Stahlberg D, Gullberg K, Liljeqvist L, Hellers G, Lofberg R. Pouchitis following pelvic pouch operation for ulcerative colitis. Incidence, cumulative risk, and risk factors. *Diseases of the colon and rectum*. 1996; 39(9):1012–8. Epub 1996/09/01. PMID: 8797652.
25. Stocchi L, Pemberton JH. Pouch and pouchitis. *Gastroenterology clinics of North America*. 2001; 30(1):223–41. Epub 2001/06/08. PMID: 11394032.
26. Heikens JT, de Vries J, van Laarhoven CJ. Quality of life, health-related quality of life and health status in patients having restorative proctocolectomy with ileal pouch-anal anastomosis for ulcerative colitis: a systematic review. *Colorectal disease: the official journal of the Association of Coloproctology of Great Britain and Ireland*. 2012; 14(5):536–44. Epub 2010/12/24. <https://doi.org/10.1111/j.1463-1318.2010.02538.x> PMID: 21176062.
27. Lipman JM, Kiran RP, Shen B, Remzi F, Fazio VW. Perioperative factors during ileal pouch-anal anastomosis predict pouchitis. *Diseases of the colon and rectum*. 2011; 54(3):311–7. Epub 2011/02/10. <https://doi.org/10.1007/DCR.0b013e3181fded4d> PMID: 21304302.
28. Hashavia E, Dotan I, Rabau M, Klausner JM, Halpern Z, Tulchinsky H. Risk factors for chronic pouchitis after ileal pouch-anal anastomosis: a prospective cohort study. *Colorectal disease: the official journal of the Association of Coloproctology of Great Britain and Ireland*. 2012; 14(11):1365–71. Epub 2012/02/22. <https://doi.org/10.1111/j.1463-1318.2012.02993.x> PMID: 22339717.
29. Klos CL, Safar B, Jamal N, Hunt SR, Wise PE, Birnbaum EH, et al. Obesity increases risk for pouch-related complications following restorative proctocolectomy with ileal pouch-anal anastomosis (IPAA). *Journal of gastrointestinal surgery: official journal of the Society for Surgery of the Alimentary Tract*. 2014; 18(3):573–9. Epub 2013/10/05. <https://doi.org/10.1007/s11605-013-2353-8> PMID: 24091910.
30. Manilich E, Remzi FH, Fazio VW, Church JM, Kiran RP. Prognostic modeling of preoperative risk factors of pouch failure. *Diseases of the colon and rectum*. 2012; 55(4):393–9. Epub 2012/03/20. <https://doi.org/10.1097/DCR.0b013e3182452594> PMID: 22426262.
31. MacRae HM, McLeod RS, Cohen Z, O'Connor BI, Ton EN. Risk factors for pelvic pouch failure. *Diseases of the colon and rectum*. 1997; 40(3):257–62. Epub 1997/03/01. PMID: 9118737.
32. Lovegrove RE, Constantinides VA, Heriot AG, Athanasiou T, Darzi A, Remzi FH, et al. A comparison of hand-sewn versus stapled ileal pouch anal anastomosis (IPAA) following proctocolectomy: a meta-analysis of 4183 patients. *Annals of surgery*. 2006; 244(1):18–26. Epub 2006/06/24. <https://doi.org/10.1097/01.sla.0000225031.15405.a3> PMID: 16794385
33. Ahmed Ali U, Keus F, Heikens JT, Bemelman WA, Berdah SV, Gooszen H, et al. Open versus laparoscopic (assisted) ileo pouch anal anastomosis for ulcerative colitis and familial adenomatous polyposis. *The Cochrane Library*. 2009.

34. Kiran RP, da Luz Moreira A, Remzi FH, Church JM, Lavery I, Hammel J, et al. Factors associated with septic complications after restorative proctocolectomy. *Annals of surgery*. 2010; 251(3):436–40. Epub 2010/02/06. <https://doi.org/10.1097/SLA.0b013e3181cf8814> PMID: 20134312.
35. Platell C, Barwood N, Makin G. Clinical utility of a de-functioning loop ileostomy. *ANZ journal of surgery*. 2005; 75(3):147–51. Epub 2005/03/22. <https://doi.org/10.1111/j.1445-2197.2005.03317.x> PMID: 15777395.
36. Wong NY, Eu KW. A defunctioning ileostomy does not prevent clinical anastomotic leak after a low anterior resection: a prospective, comparative study. *Diseases of the colon and rectum*. 2005; 48(11):2076–9. Epub 2005/08/09. <https://doi.org/10.1007/s10350-005-0146-1> PMID: 16086220.
